# Supplementary material
Source: Springer Nature journal article supplement (https://www.springermedizin.de/resource/supplementary/12889_2011_3499_MOESM2_ESM.pdf/9489226)

Prevalence of albuminuria (%)

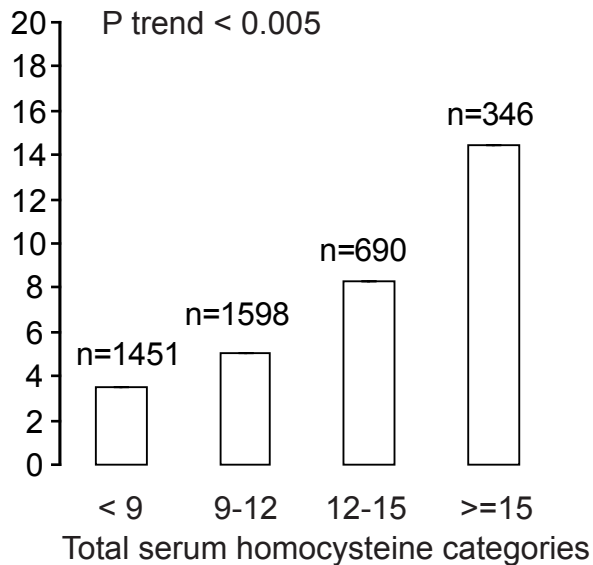

MDRD < 90  
ml/min/1.73 m<sup>2</sup>

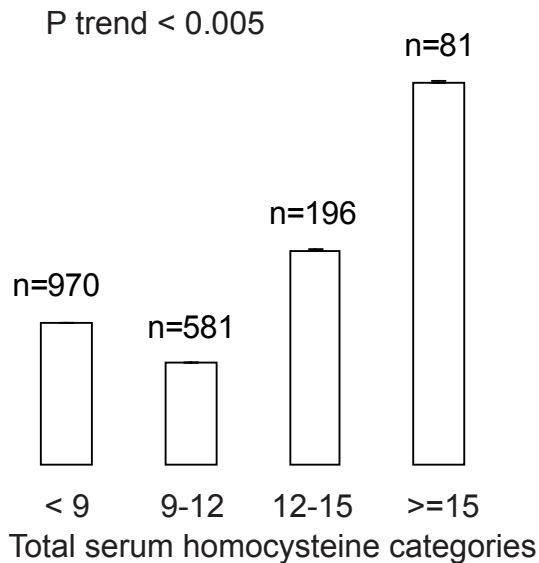

MDRD ≥ 90  
ml/min/1.73 m<sup>2</sup>

Supplement: MOESM2 [file 9489226]
